# Supplementary material
Source: publisher figshare collection journal article supplement (https://frontiersin.figshare.com/ndownloader/files/20157866)
Supplement: Supplementary file [file 20157866]

## ***Supplementary Material***

### **1 Supplementary Figures and Tables**

#### **1.1 Supplementary Figures**

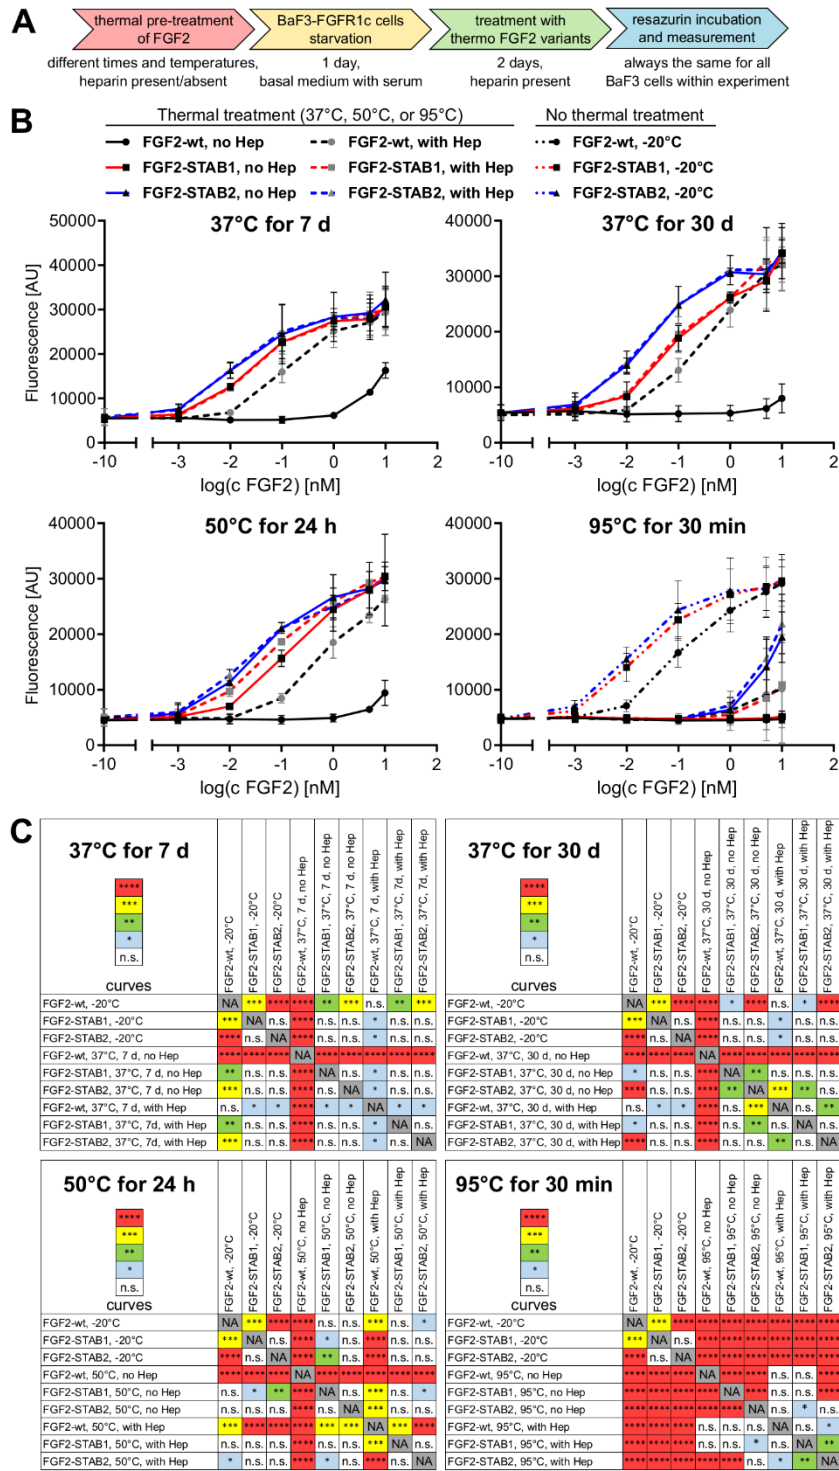

**SUPPLEMENTARY FIGURE 1 | FGF2-STABs show increased thermal stability. (A-C)** Thermostability testing using proliferation assay on BaF3-FGFR1c cells. **(A)** Experimental design scheme. FGF2 variants were exposed to 37°C, 50°C, or 95°C in the presence (2 µg/ml heparin; with Hep) or absence of heparin (no Hep) for the indicated time, or not thermally treated at all but stored at -20°C, and then used to treat the BaF3-FGFR1c cells. BaF3-FGFR1c cells were seeded in basal medium containing serum and treated with FGF2 variants in the presence of heparin (2 µg/ml) for 4 days. **(B)** The line plots show resorufin fluorescence, measured after 4 days of culture with FGF2 variants, as mean ± SD,  $n = 2-3$ . For visual clarity, the plots for thermally non-treated FGF2 variants (-20°C) are shown only in the plots with 95°C-treated variants, otherwise they were too much overlapping with the curves in graphs of other thermal treatments. **(C)** The color

maps show results of statistical comparison of curves from A. \* $P < 0.05$ ; \*\* $P < 0.01$ ; \*\*\* $P < 0.001$ ; \*\*\*\* $P < 0.0001$ ; n.s., not significant (two-way ANOVA). NA, not applicable.

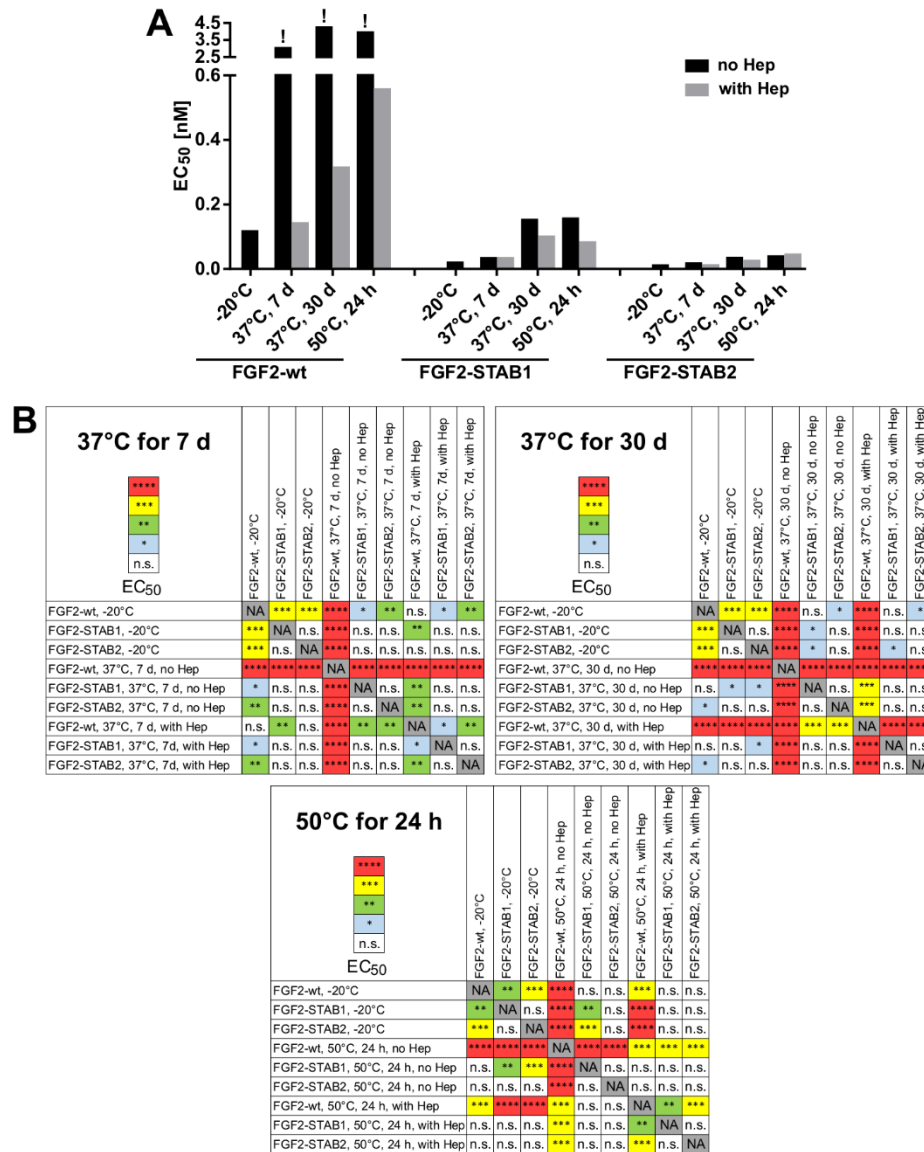

**SUPPLEMENTARY FIGURE 2 | FGF2-STABs show increased thermal stability, as indicated by their lower EC<sub>50</sub> values. (A)** The bar plot presents EC<sub>50</sub> values of FGF2 variants after thermal treatments, calculated from data presented in **Supplementary Figure 1A**. The exclamation mark (!) indicates EC<sub>50</sub> values that are only rough estimates from the available data; however, true EC<sub>50</sub> values are most likely higher because at the range of concentrations tested, maximum response was not reached. **(B)** The color maps show results of statistical analysis of EC<sub>50</sub> values of FGF2 variants after thermal treatment calculated from data presented in **Supplementary Figure 1A**. \**P* < 0.05; \*\**P* < 0.01; \*\*\**P* < 0.001; \*\*\*\**P* < 0.0001; n.s., not significant (one-way ANOVA, Tukey's multiple comparisons test). NA, not applicable.

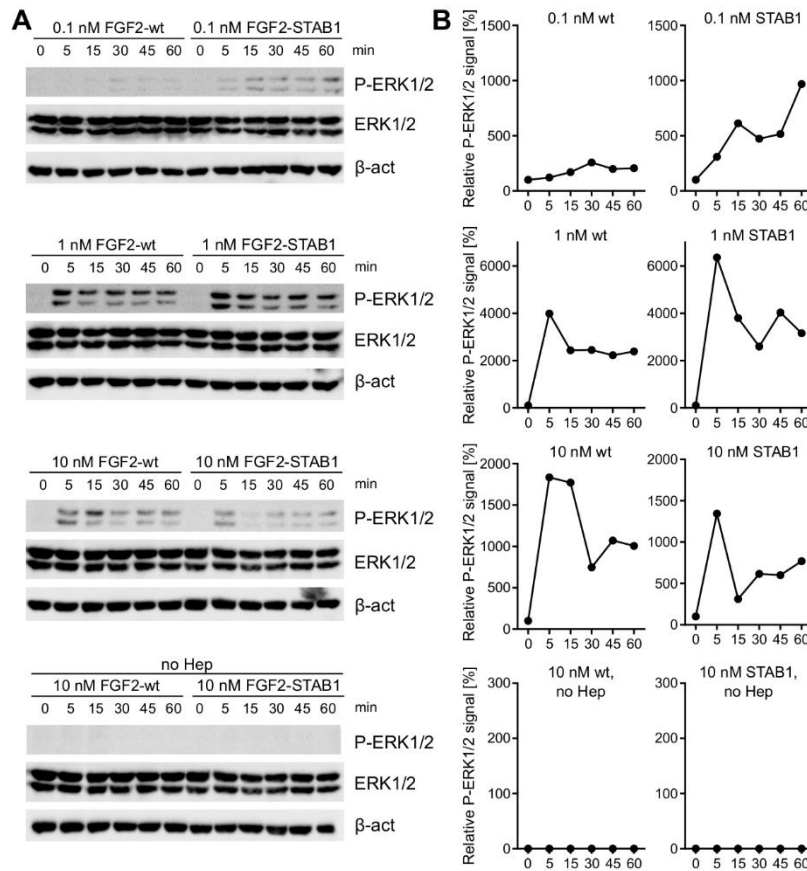

**SUPPLEMENTARY FIGURE 3 |** In BaF3-FGFR1c cells and in the presence of heparin, FGF2-STAB is more efficient at inducing ERK1/2 signaling at low concentrations than FGF2-wt. **(A, B)** Analysis of ERK1/2 phosphorylation dynamics in response to FGF2 variants in BaF3-FGFR1c cells by Western blot. **(A)** Representative photographs of Western blot analysis of ERK1/2 phosphorylation in response to 0.1 to 10 nM FGF2-wt, or FGF2-STAB1 in the presence of 2 µg/ml heparin (Hep), and to 10 nM FGF2 variants in the absence of heparin. P-ERK1/2 (Thr202/Tyr204), ERK, and β-actin (β-act) signals were detected on a single blot. **(B)** Graphical presentation of ERK1/2 phosphorylation dynamics. The line plots indicate the relative amount of ERK1/2 phosphorylation, normalized to total ERK1/2. Each line represents one experiment (an independent biological replicate).

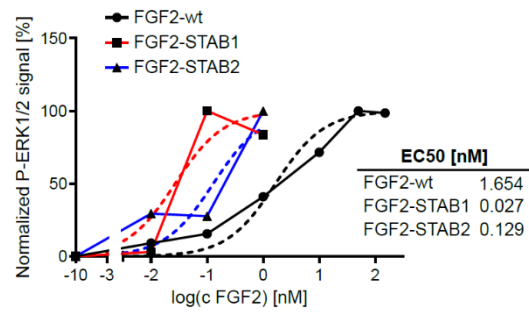

**SUPPLEMENTARY FIGURE 4** | Calculation of the EC<sub>50</sub> values of FGF2-wt, FGF2-STAB1 and FGF2-STAB2 in primary mammary fibroblasts. The EC<sub>50</sub> values were calculated from the sigmoidal part of normalized dose-response curves of ERK1/2 phosphorylation at 5 min after addition of FGF2 in the absence of heparin. The plot is related to the data depicted in **Figures 5** and **6**.



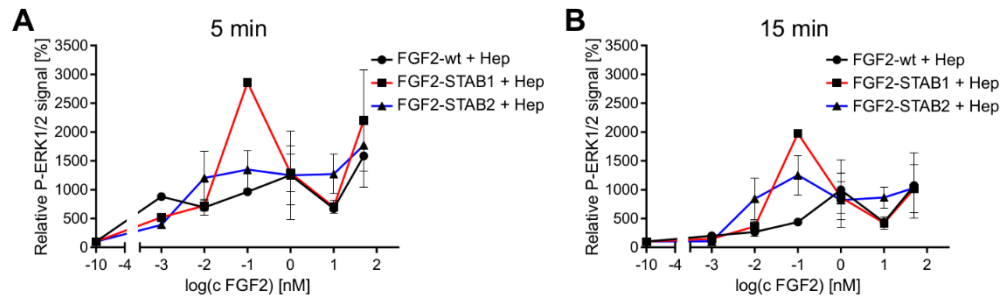

**SUPPLEMENTARY FIGURE 6 |** Dose-response profile of ERK1/2 activation after treatment with FGF2 variants and heparin. **(A, B)** Comparison of ERK1/2 phosphorylation at 5 min **(A)** or 15 min **(B)** after treatment with FGF2 and heparin (4  $\mu$ g/ml) in primary fibroblasts. The line plots represent mean  $\pm$  SEM of data represented in **Supplementary Figure 5** ( $n = 1-5$ ).



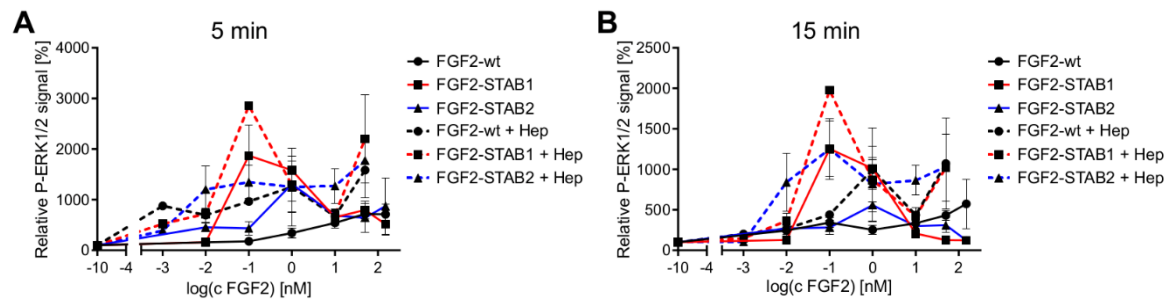

**SUPPLEMENTARY FIGURE 7 |** Dose-response profile of ERK1/2 activation after treatment with FGF2 variants, in the presence and absence of heparin. **(A, B)** Comparison of ERK1/2 phosphorylation at 5 min **(A)** or 15 min **(B)** after FGF2 treatment. The line plots represent mean  $\pm$  SEM of data represented in **Figure 6** and **Supplementary Figure 5** ( $n = 1-5$ ).

## 1.2 Supplementary Tables

**SUPPLEMENTARY TABLE 1** | The dependence of EC<sub>50</sub> values of FGF2 variants on thermal treatment and heparin. The EC<sub>50</sub> values were calculated from experiments in BaF3-FGFR1c cells from plots depicted in **Supplementary Figure 1A**. The exclamation mark (!) indicates rough estimate values from the available data; however, true EC<sub>50</sub> values are most likely higher because at the range of concentrations tested, maximum response was not reached.

| FGF2<br>variant | thermal<br>treatment | EC <sub>50</sub> [nM] |              |
|-----------------|----------------------|-----------------------|--------------|
|                 |                      | no heparin            | with heparin |
| FGF2-wt         | -20°C                | 0.120                 | NA           |
|                 | 37°C, 7 days         | 3.090 (!)             | 0.145        |
|                 | 37°C, 30 days        | 4.298 (!)             | 0.318        |
|                 | 50°C, 24 h           | 4.011 (!)             | 0.560        |
| FGF2-STAB1      | -20°C                | 0.024                 | NA           |
|                 | 37°C, 7 days         | 0.037                 | 0.037        |
|                 | 37°C, 30 days        | 0.156                 | 0.104        |
|                 | 50°C, 24 h           | 0.160                 | 0.086        |
| FGF2-STAB2      | -20°C                | 0.015                 | NA           |
|                 | 37°C, 7 days         | 0.021                 | 0.015        |
|                 | 37°C, 30 days        | 0.038                 | 0.029        |
|                 | 50°C, 24 h           | 0.043                 | 0.048        |
